# BRCA somatic and germline mutation detection in paraffin embedded ovarian cancers by next-generation sequencing

Andrea Mafficini<sup>1,\*</sup>, Michele Simbolo<sup>1,\*</sup>, Alice Parisi<sup>2</sup>, Borislav Rusev<sup>1,2</sup>, Claudio Luchini<sup>1,2</sup>, Ivana Cataldo<sup>1</sup>, Elena Piazzola<sup>2</sup>, Nicola Sperandio<sup>1</sup>, Giona Turri<sup>2</sup>, Massimo Franchi<sup>3</sup>, Giampaolo Tortora<sup>4</sup>, Chiara Bovo<sup>5</sup>, Rita T. Lawlor<sup>1,2</sup> and Aldo Scarpa<sup>1,2</sup>

<sup>1</sup> ARC-Net Research Centre, University and Hospital Trust of Verona, Verona, Italy

<sup>2</sup> Department of Pathology & Diagnostics, University and Hospital Trust of Verona, Verona, Italy

<sup>3</sup> Department of Gynecology, University and Hospital Trust of Verona, Verona, Italy

<sup>4</sup> Comprehensive Cancer Centre, University and Hospital Trust of Verona, Verona, Italy

<sup>5</sup> Board of Directors, University and Hospital Trust of Verona, Verona, Italy

\* Shared first authors

**Correspondence to:** Rita T. Lawlor, email: ritateresa.lawlor@univr.it

**Keywords:** BRCA1-BRCA2, ovarian carcinoma, next generation sequencing, PARP inhibitor, olaparib

**Received:** November 10, 2015

**Accepted:** December 29, 2015

**Published:** January 07, 2016

## ABSTRACT

**BRCA mutated ovarian cancers respond better to platinum-based therapy and to the recently approved PARP-inhibitors. There is the need for efficient and timely methods to detect both somatic and germline mutations using formalin-fixed paraffin-embedded (FFPE) tissues and commercially available technology. We used a commercial kit exploring all exons and 50bp exon-intron junctions of *BRCA1* and *BRCA2* genes, and semiconductor next-generation sequencing (NGS) on DNA from 47 FFPE samples of high-grade serous ovarian cancers. Pathogenic mutations were found in 13/47 (28%) cancers: eight in *BRCA1* and five in *BRCA2*. All *BRCA1* and two *BRCA2* mutations were germline; three *BRCA2* mutations were somatic. All mutations were confirmed by Sanger sequencing. To evaluate the performance of the NGS panel, we assessed its capability to detect the 6,953 variants described for *BRCA1* and *BRCA2* in ClinVar and COSMIC databases using callability analysis. 6,059 (87.1%) variants were identified automatically by the software; 829 (12.0%) required visual verification. The remaining 65 (0.9%) variants were uncallable, and would require 15 Sanger reactions to be resolved. Thus, the sensitivity of the NGS-panel was 99.1%. In conclusion, NGS performed with a commercial kit is highly efficient for detection of germline and somatic mutations in *BRCA* genes using routine FFPE tissue.**

## INTRODUCTION

Ovarian cancer is the most deadly tumour of the female reproductive system with 238,700 new cases and 151,900 deaths worldwide [1-3], of which 65,500 new cases and 42,700 deaths in Europe in 2012 [4]. In Italy, ovarian cancer accounts for 30% of all tumours of the female genital apparatus, and in 2013 there were 4,800 new cases and 37,829 prevalent cases [5].

*BRCA1* and *BRCA2* are among the most frequently mutated genes in high-grade ovarian serous carcinoma, which is responsible for the vast majority of ovarian

cancer deaths [6, 7]. *BRCA1* and *BRCA2* genes are key partners of the homologous recombination (HR) DNA repair system, together with *ATM*, *BARD1*, *NBN* and other genes [6]. Indeed, germline and somatic mutations in HR genes occur in about 30% of patients with ovarian carcinoma, of which up to 75% are in *BRCA1* and *BRCA2* genes [6, 8].

Patients carrying a germline or somatic *BRCA1/BRCA2* mutation have been associated with a better prognosis and a better response to platinum-based therapy [8-11]. A particular class of drugs, poly(ADP-ribose) polymerase-inhibitors (PARPi), has been shown to be effective for targeted treatment of cancers harbouring

*BRCA1* or *BRCA2* mutations [12-18]. The PARP-1 protein is critical to the repair of single-strand DNA breaks. In cells with defective HR, such as the *BRCA* mutations carriers, PARP-1 inhibition is synthetic lethal and results in cell cycle arrest and subsequent apoptosis [15]. On December 2014 the European Medicines Agency (EMA) and the U.S.A. Food and Drug Administration (FDA) approved the PARPi olaparib [13-15] for treatment of *BRCA1/BRCA2* mutated ovarian cancer.

Investigating *BRCA* mutational status in ovarian cancer patients has thus a key role, not only for the identification of familial cancer predisposition but also to address therapeutic choices. Germline testing of *BRCA* is widespread in medical genetics laboratories, but this approach excludes patients with somatic *BRCA* mutations, i.e. only present in cancer cells, from the opportunity to avail of PARPi therapies. Testing *BRCA* on formalin-fixed paraffin-embedded (FFPE) samples would permit the simultaneous assessment of both somatic and germline mutations using an easily accessible material that is routinely available in any pathology laboratory worldwide.

High throughput next-generation sequencing (NGS) technologies permit fast multiplex testing on small quantities of DNA with budding applications in cancer diagnostics as they improve both the capacity and the cost-effectiveness of mutational analysis compared with Sanger [19-23]. To assess the feasibility of using NGS in routine diagnostic activity for *BRCA* analysis, we have investigated *BRCA1* and *BRCA2* mutations in 47 high-grade serous tumours of the ovary, using a commercially available kit and semiconductor NGS on FFPE tissue samples.

## RESULTS

The results of NGS targeted sequencing are reported in Table 1 and an example is shown Figure 1. DNA from all samples was successfully amplified in multiplex PCR and an adequate library for NGS was obtained. The mean read length was 112 base pairs and a mean coverage of 3,507x was achieved, with 99.6% target bases covered more than 100x.

### Pathogenic variants

Pathogenic mutations in *BRCA* genes were found in 13 of the 47 (28%) ovarian cancers: eight were in *BRCA1* and five in *BRCA2* (Table 1).

Of the eight mutations in *BRCA1* gene, five were frame-shifts resulting in a premature stop codon, one was a nonsense mutation, one was an in-frame single codon deletion and one was a missense mutation. Frame-shift, nonsense and in-frame deletion mutations are recorded as pathogenic in the ClinVar database; the only missense mutation found (c.5309C>T; p.Pro1770Leu)

has not yet been recorded, but falls in the same codon where a pathogenic missense mutation (c.5309C>G; p.Pro1770Arg) is recorded in ClinVar (Table 1). All of the *BRCA1* mutations were germline as assessed by the analysis of DNA from matched normal tissue.

Of the five *BRCA2* mutations, four were frame-shifts (three deletions and one insertion) resulting in a premature stop codon and one was a nonsense point mutation. Three of the *BRCA2* mutations were somatic and two were germline as assessed by the analysis of matched normal tissue DNA (Table 1). One of the somatic (c.7069\_7070delCT) and one of the germline (c.6202dupA) mutations are recorded as pathogenic in the ClinVar database. The remaining two somatic and one germline *BRCA2* mutations have not yet been recorded but were considered pathogenic as they cause a premature stop codon, a feature of pathogenic mutations.

All the above variants were confirmed at Sanger sequencing (Figure1), therefore our estimated specificity was 100%.

### Additional variants

In the *BRCA1* gene, an additional germline variant, c.3119G>A (p.Ser1040Asn), was found in two cases. This variant is recorded as benign/likely benign in the ClinVar database by eight submitters, as uncertain by one and as pathogenic by one; its frequency in the global population is 1% according to the 1000Genomes project database [24]. In the *BRCA2* gene, two germline single nucleotide polymorphisms (SNP) were also detected in 29 patients: 24 harboured the c.1114A>C (p.Asn372His) SNP, three the c.865A>C (p.Asn289His) SNP, and two patients had both. The first SNP, c.1114A>C (p.Asn372His), has been recorded as benign in the ClinVar database by four submitters and as pathogenic by one; its frequency in the global population is 25% according to the 1000Genomes project database. The second SNP, c.865A>C (p.Asn289His), has been recorded as benign by seven submitters; its frequency in the global population is 7%.

### Sensitivity of targeted NGS

To evaluate the performance of the NGS panel, we assessed its capability to detect the 6,953 variants described for *BRCA1* and *BRCA2*, comprising 6,106 germline variants in the ClinVar database and 1,071 somatic mutations in COSMIC database, of which 224 overlap (Table 2).

Analysis of callable/uncallable/poorly mapped loci was performed to discriminate between variants which can be automatically detected by the software from those that are hindered by sequencing errors due to homopolymers or PCR amplification artefacts. The procedure is described in detail in the Methods section. This analysis showed that

**Table 1: Pathogenic mutations in *BRCA1* and *BRCA2* detected by next-generation sequencing of 47 ovarian cancers.**

| Case | <i>BRCA1</i>                            | <i>BRCA2</i>                           | Mutation type     | Germline-somatic | dbSNP ID    | ClinVar class |
|------|-----------------------------------------|----------------------------------------|-------------------|------------------|-------------|---------------|
| 3506 | c.5329dupC<br>p.Gln1777ProfsTer74       | -                                      | Frameshift        | Germline         | rs397507247 | Pathogenic    |
| 3513 | c.676delT<br>p.Cys226ValfsTer8          | -                                      | Frameshift        | Germline         | rs80357941  | Pathogenic    |
| 3508 | c.1687C>T<br>p.Gln563Ter                | -                                      | Nonsense          | Germline         | rs80356898  | Pathogenic    |
| 3521 | c.2405_2406delTG<br>p.Val802GlufsTer7   | -                                      | Frameshift        | Germline         | rs80357706  | Pathogenic    |
| 3528 | c.2405_2406delTG<br>p.Val802GlufsTer7   | -                                      | Frameshift        | Germline         | rs80357706  | Pathogenic    |
| 3489 | c.3767_3768delCA<br>p.Thr1256ArgfsTer10 | -                                      | Frameshift        | Germline         | rs730881440 | Pathogenic    |
| 3505 | c.5125_5127delGTT<br>p.Val1709del       | -                                      | In-frame deletion | Germline         | rs80358344  | Pathogenic    |
| 3520 | c.5309C>T<br>p.Pro1770Leu               | -                                      | Missense          | Germline         | -           | _*            |
| 3512 | -                                       | c.2813delC<br>p.Ala938GlufsTer22       | Frameshift        | Somatic          | -           | _**           |
| 3523 | -                                       | c.6202dupA<br>p.Ile2068AsnfsTer10      | Frameshift        | Germline         | rs397507833 | Pathogenic    |
| 3514 | -                                       | c.6574delA<br>p.Met2192TrpfsTer14      | Frameshift        | Germline         | -           | _**           |
| 3501 | -                                       | c.7069_7070delCT<br>p.Leu2357ValfsTer2 | Frameshift        | Somatic          | rs80359636  | Pathogenic    |
| 3516 | -                                       | c.8614G>T<br>p.Glu2872Ter              | Nonsense          | Somatic          | -           | _**           |

\* This variant is not recorded on ClinVar, but a variant on the very same codon, ClinVar variant :c.5309C>G (p.Pro1770Arg, rs80357462) is recorded as Pathogenic.

\*\* These variants are not recorded in either dbSNP or ClinVar, however they cause a premature stop codon, which is a feature of pathogenic mutations.

**Table 2: Somatic and Germline BRCA mutation callability analysis of HR1 Next-Generation kit vs Sanger sequencing**

| GENE  | Coding region (bp) | ClinVar – COSMIC Variants* | Total variants* | N. Sanger needed <sup>s</sup> | Callability ° of HR1 Next-Generation Sequencing and Variant Caller software |                 |               |                 |
|-------|--------------------|----------------------------|-----------------|-------------------------------|-----------------------------------------------------------------------------|-----------------|---------------|-----------------|
|       |                    |                            |                 |                               | AutomaticCalls                                                              | Called by IGV** | Uncallable*** | Sensitivity (%) |
| BRCA1 | 5,659              | 2,522 - 398                | 2,841           | 55                            | 2,520                                                                       | 320             | 1             | 99.9            |
| BRCA2 | 10,262             | 3,584 - 673                | 4,112           | 77                            | 3,539                                                                       | 509             | 64            | 98.4            |
| Total | 15,921             | 6,106 - 1,071              | 6,953           | 132                           | 6,059                                                                       | 829             | 65            | 99.1            |

° Callability analysis using the Torrent Variant Caller.

\* Germline variants listed in the ClinVar database (<http://www.ncbi.nlm.nih.gov/clinvar/>) and mutations in COSMIC database (<http://cancer.sanger.ac.uk/cancergenome/projects/cosmic/>). The number of total variants is less than the sum of variants from both databases (7177) because 224 variants overlap.

<sup>s</sup> Estimate based on one reaction per 150 bp (one per exon if <150 bp) using DNA from formalin-fixed paraffin-embedded tissue

\*\* Visual verification of sequences with Integrative Genomics Viewer (IGV v.2.3, Broad Institute) software.

\*\*\* Mutations within homopolymer stretches, artefact-prone regions of the genes, or not covered by the NGS panel. The number of Sanger to solve these 65 blind spots would be 1 for *BRCA1* and 14 for *BRCA2*.

the HR1 NGS-kit obtained a clear sequence of the DNA regions harbouring 6059 (87.1%) of these variants that were automatically identified by the Variant Caller Plugin software (Torrent Suite Software v4.6; Life Technologies), while the regions harbouring the remaining 894 (12.9%) variants were challenging for automatic detection. Of these, 829 (12.0%) variants were automatically identified by the software but with low confidence due to their proximity to homopolymer stretches or artefact-prone regions and thus required confirmation/correction by visual inspection of the region using the Integrative Genomics Viewer (IGV) v2.3 (Broad Institute). In detail, the number of variants that required visual inspection to

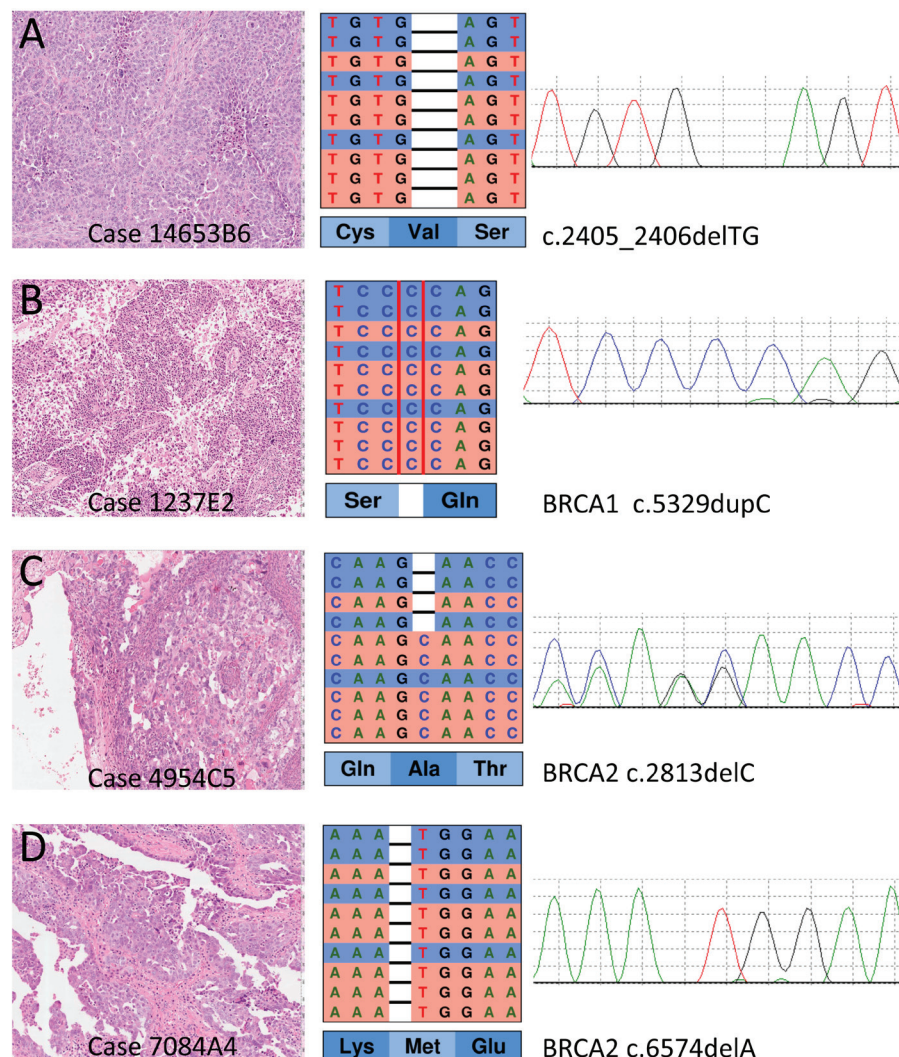

## DISCUSSION

The assessment of *BRCA* mutational status in ovarian cancer patients plays a double role. The first is the identification of familial cancer predisposition; the second is to address therapeutic choices.

*BRCA1* and *BRCA2* germline mutations are known risk factors for ovarian cancer [2, 7, 25-33], and it has been reported that up to 44% of patients without a family history of ovarian cancer harbour a germline *BRCA1* or *BRCA2* mutation, and as such may act as first alert for descendants [10].

The better response to platinum and the recent approval of PARP-inhibitors for therapy of ovarian cancers harbouring mutations in *BRCA* genes calls for methods able to detect not only germline but also somatic mutations in these genes.

Molecular tests to analyse *BRCA* mutations are generally carried out on germline DNA from blood samples to identify hereditary mutations as part of risk assessment programs. However, in order to identify somatic mutations present in neoplastic cells to permit the patient to benefit from drugs such as olaparib, it is necessary to analyze DNA from the tumour tissue.

The analysis of *BRCA* on diagnostic tissue is complex due to: 1) the type of possible mutations in these genes; 2) the fact that these mutations may be found in any part of these genes which are very large and as such require the entire gene to be sequenced; and 3) the limited quantity and low quality of DNA available from routine diagnostic FFPE tissue is limited. It is therefore important to be able to sequence the entire *BRCA* genes using minimal amounts of DNA to identify pathogenic mutations relevant to patient treatment.

In this study, we tested a commercially available NGS sequencing panel on small quantities of DNA purified from FFPE tissue to evaluate the use of these technologies for diagnostic applications.

The analysis of 47 high grade serous ovarian cancers identified 13 (28%) pathogenic mutations, 8 *BRCA1* and 5 *BRCA2*. All *BRCA1* and two *BRCA2* mutations were germline while three *BRCA2* mutations were somatic. *BRCA1* and *BRCA2* mutations were mutually exclusive. All 13 *BRCA* variants were confirmed by Sanger sequencing, demonstrating an estimated specificity of 100%.

To evaluate sensitivity of the NGS panel, we assessed its capability to detect all 6,953 germline or somatic variants described for *BRCA1* and *BRCA2* in the ClinVar and COSMIC databases using the analysis of callable loci (details in Methods section). A total of 6,059 (87.1%) of these variants were automatically identified by the Torrent Variant Caller software. A further 829 (12.0%) were imprecisely identified by the software and required confirmation/correction by visual inspection of the region. This was due to the mutations being either

inside or in close proximity of homopolymer stretches or PCR amplification artefacts. The remaining 65 (0.9%) variants were uncallable resulting in the sensitivity of the HR1 NGS-panel at 99.1%, as it would miss 65/6,953 variants. These could be resolved, however, with 15 Sanger sequencing reactions.

In conclusion, our study shows that next-generation sequencing performed with a commercial kit (HR1, 4Bases) is highly efficient for detection of germline and somatic mutations in *BRCA1* and *BRCA2* genes using DNA from routinely available FFPE tissue.

## MATERIALS AND METHODS

### Cases

The study series comprised 47 samples of high grade serous ovarian carcinomas, diagnosed according to WHO classification criteria [2], from patients who underwent surgical resection between 2010 and 2015 (mean age 61±12 years, median 62 years) at the Department of Obstetrics and Gynaecology of the University Hospital Trust of Verona. Five patients were diagnosed at stage IV, 35 at stage IIIC, 4 at stage I and 3 at stage IC, according to FIGO staging system [34].

### Ethics

The samples were acquired from the Integrated University Hospital Trust of Verona Pathology archives under the amended Program 1885, that permits the acquisition of FFPE samples by the ARC-Net (Applied Research on Cancer) biobank of the University of Verona and the Hospital Trust of Verona following the re-consent of patients or the anonymization of samples under protocol 52438 Prog. 1885 approved 23/11/2010. The amendment also addresses the regulatory issue of data protection and disclosure in genomic studies. Subsequent approval for this study was presented and approved under protocol 44541 on 29/09/2015.

### DNA extraction and qualification

FFPE samples of ovarian cancers were enriched for neoplastic cellularity to a minimum of 70% by manual microdissection of 10 consecutive 4-µm sections. DNA was purified using the QIAamp FFPE Tissue Kit (Qiagen) and qualified as previously reported [35, 36]. Briefly, DNA was quantified using Qubit (LifeTechnologies) platforms, and its quality was further evaluated by NanoDrop (Life Technologies) and PCR analysis using the BIOMED 2 PCR multiplex protocol [36].

## Deep sequencing of multiplex PCR amplicons

The HR1 kit (4bases SA, Switzerland) was used. This kit explores all exons of *BRCA1* (n=24; NM\_007300.3) and *BRCA2* (n=27; NM\_000059.3) and 50 bp exon-intron junctions. The kit is composed of three multiplex PCR primer pools, and uses 30 nanograms of DNA, ten per primer pool, for multiplex PCR amplification, followed by ligation of a specific barcode-sequence to each sample for identification. The quality of the obtained libraries was evaluated by the Agilent 2100 Bioanalyzer on-chip electrophoresis (Agilent Technologies) as previously described [35]. Emulsion PCR for clonal amplification of libraries was performed with the Ion OneTouch OT2 System and the Hi-Q OT2 200 Kit (Life Technologies); libraries were processed in batches of eight samples per emulsion. Sequencing of the libraries was performed on Personal Genome Machine (PGM, Life Technologies) using the Ion 318 Chip and the Ion PGM Hi-Q Sequencing 200 Kit (Life Technologies).

## Data analysis and variant calling

Data analysis, including alignment to the hg19 human reference genome and variant calling, was done using the Torrent Suite Software v4.6 (Life Technologies). Filtered variants were annotated using a custom pipeline based on vcflib (<https://github.com/ekg/vcflib>), SnpSift [37], the Variant Effect Predictor (VEP) software [38] and NCBI RefSeq database. Alignments were visually verified with the Integrative Genomics Viewer (IGV) v2.3 [39].

## Analysis of callable loci

Analysis of callable/uncallable/poorly mapped loci was performed using the Torrent Variant Caller, to discriminate between variants which can be automatically detected from those that are hindered by sequencing errors due to homopolymers or PCR amplification artefacts. SNPs and small (<100 bp) INDELs spanning the coding regions of *BRCA1* and *BRCA2* were retrieved from the ClinVar and COSMIC databases in VCF format, converted to a Hotspots file and used to guide variant calling. In this way, the variant caller is forced to analyse a given hotspot coordinate; if there is no mutation, the software outputs that the position is “reference”; otherwise it outputs the mutation detected. If there are problems in the sequence at that position, the software outputs a “no call” value indicating if variant calling failed due to strand bias, low quality of bases, noise in the sequence, poor mapping. All the “no call” positions were further inspected by visual verification of the alignment file to ascertain whether the “no call” status was due to artefacts or homopolymer misalignment. This analysis was carried out for each of the

47 samples and the frequency of “no call” status for each hotspot coordinate was recorded.

## DNA Sanger sequencing

Mutations of *BRCA1* and *BRCA2* were validated by Sanger sequencing (primer sequences available upon request). PCR products were purified using Agencourt AMPure XP magnetic beads (Beckman Coulter) and labelled with BigDye® Terminator v3.1 (Applied Biosystems). Agencourt CleanSEQ magnetic beads (Beckman Coulter) were used for post-labeling DNA fragment purification, and sequence analysis was performed on the Applied Biosystems 3130xl Genetic Analyzer.

## Abbreviations

EMA, European Medicines Agency; FDA, Food and Drug Administration; FFPE, formalin-fixed paraffin embedded; FIGO, International Federation of Gynecology and Obstetrics; HR, homologous recombination; IGV, Integrative Genomics Viewer; NGS, Next-Generation Sequencing; PARP, poly(ADP-ribose) polymerase; PARPi, poly(ADP-ribose) polymerase-inhibitors; PCR, polymerase chain reaction; PGM, personal genome machine; SNP, single nucleotide polymorphism.

## ACKNOWLEDGMENTS

We thank Giada Bonizzato, Sonia Grimaldi, and Paola Merlini of the ARC-Net biobank.

## CONFLICTS OF INTEREST

4bases provided kits free of charge.

## GRANT SUPPORT

Italian Cancer Genome Project grant from the Italian Ministry of Research (FIRB - RBAP10AHJB), Associazione Italiana Ricerca sul Cancro (AIRC grant n. 12182), and Seventh Framework European Community grant (Cam-Pac, Grant agreement no: 602783).

## Authors' contribution

RTL, CB, AS: ideation and planning of the study; AP, EP: histopathological evaluation according to WHO classification; BR: sample microdissection; NS: preparation and quality control of DNA; MS, AM: next-gen sequencing including data analysis and interpretation; GTu: Sanger sequencing; CL, IC: sample choice and preparation, collection and assembly of clinical-

pathological data; AS, MF, GTo: clinical-pathological data analysis and interpretation of results related to clinical implications of the peculiar tumour type; all authors participated in writing and approved the final, submitted manuscript.

## REFERENCES

1. Torre LA, Bray F, Siegel RL, Ferlay J, Lortet-Tieulent J and Jemal A. Global cancer statistics, 2012. *CA Cancer J Clin*. 2015; 65:87-108.
2. Kurman RJ, Carcangiu ML, Herrington CS and Young RH. (2014). WHO Classification of Tumours of Female Reproductive Organs. (Lyon: International Agency for Research on Cancer (IARC)).
3. Tewari KS and Monk BJ. (2015). The 21st century handbook of clinical ovarian cancer. (Berlin Heidelberg New York: Springer).
4. Ferlay J, Steliarova-Foucher E, Lortet-Tieulent J, Rosso S, Coebergh JW, Comber H, Forman D and Bray F. Cancer incidence and mortality patterns in Europe: estimates for 40 countries in 2012. *Eur J Cancer*. 2013; 49:1374-1403.
5. AIOM-AIRTUM. (2015). The numbers of cancer in Italy ([http://www.aiom.it/C\\_Common/Download.asp?file=/Site\\$/2015\\_I\\_Numeri\\_del\\_cancro.pdf](http://www.aiom.it/C_Common/Download.asp?file=/Site$/2015_I_Numeri_del_cancro.pdf)).
6. Cancer Genome Atlas Research Network. Integrated genomic analyses of ovarian carcinoma. *Nature*. 2011; 474:609-615.
7. Hilton JL, Geisler JP, Rathe JA, Hattermann-Zogg MA, DeYoung B and Buller RE. Inactivation of BRCA1 and BRCA2 in ovarian cancer. *J Natl Cancer Inst*. 2002; 94:1396-1406.
8. Pennington KP, Walsh T, Harrell MI, Lee MK, Pennil CC, Rendi MH, Thornton A, Norquist BM, Casadei S, Nord AS, Agnew KJ, Pritchard CC, Scroggins S, Garcia RL, King MC and Swisher EM. Germline and somatic mutations in homologous recombination genes predict platinum response and survival in ovarian, fallopian tube, and peritoneal carcinomas. *Clin Cancer Res*. 2014; 20:764-775.
9. Dann RB, DeLoia JA, Timms KM, Zorn KK, Potter J, Flake DD, 2nd, Lanchbury JS and Krivak TC. BRCA1/2 mutations and expression: response to platinum chemotherapy in patients with advanced stage epithelial ovarian cancer. *Gynecol Oncol*. 2012; 125:677-682.
10. Alsop K, Fereday S, Meldrum C, deFazio A, Emmanuel C, George J, Dobrovic A, Birrer MJ, Webb PM, Stewart C, Friedlander M, Fox S, Bowtell D and Mitchell G. BRCA mutation frequency and patterns of treatment response in BRCA mutation-positive women with ovarian cancer: a report from the Australian Ovarian Cancer Study Group. *J Clin Oncol*. 2012; 30:2654-2663.
11. Bolton KL, Chenevix-Trench G, Goh C, Sadetzki S, Ramus SJ, Karlan BY, Lambrechts D, Despierre E, Barrowdale D, McGuffog L, Healey S, Easton DF, Sinilnikova O, Benitez J, Garcia MJ, Neuhausen S, et al. Association between BRCA1 and BRCA2 mutations and survival in women with invasive epithelial ovarian cancer. *JAMA*. 2012; 307:382-390.
12. Fong PC, Yap TA, Boss DS, Carden CP, Mergui-Roelvink M, Gourley C, De Greve J, Lubinski J, Shanley S, Messiou C, A'Hern R, Tutt A, Ashworth A, Stone J, Carmichael J, Schellens JH, et al. Poly(ADP-ribose) polymerase inhibition: frequent durable responses in BRCA carrier ovarian cancer correlating with platinum-free interval. *J Clin Oncol*. 2010; 28:2512-2519.
13. Ledermann J, Harter P, Gourley C, Friedlander M, Vergote I, Rustin G, Scott C, Meier W, Shapira-Frommer R, Safra T, Matei D, Macpherson E, Watkins C, Carmichael J and Matulonis U. Olaparib maintenance therapy in platinum-sensitive relapsed ovarian cancer. *N Engl J Med*. 2012; 366:1382-1392.
14. Lee JM, Hays JL, Annunziata CM, Noonan AM, Minasian L, Zujewski JA, Yu M, Gordon N, Ji J, Sissung TM, Figg WD, Azad N, Wood BJ, Doroshow J and Kohn EC. Phase I/II study of olaparib and carboplatin in BRCA1 or BRCA2 mutation-associated breast or ovarian cancer with biomarker analyses. *J Natl Cancer Inst*. 2014; 106:dju089.
15. Tewari KS, Eskander RN and Monk BJ. Development of Olaparib for BRCA-Deficient Recurrent Epithelial Ovarian Cancer. *Clin Cancer Res*. 2015; 21:3829-3835.
16. Wagner LM. Profile of veliparib and its potential in the treatment of solid tumors. *Onco Targets Ther*. 2015; 8:1931-1939.
17. Oza AM, Cibula D, Benzaquen AO, Poole C, Mathijssen RH, Sonke GS, Colombo N, Spacek J, Vuylsteke P, Hirte H, Mahner S, Plante M, Schmalfeldt B, Mackay H, Rowbottom J, Lowe ES, et al. Olaparib combined with chemotherapy for recurrent platinum-sensitive ovarian cancer: a randomised phase 2 trial. *Lancet Oncol*. 2015; 16:87-97.
18. Ledermann J, Harter P, Gourley C, Friedlander M, Vergote I, Rustin G, Scott CL, Meier W, Shapira-Frommer R, Safra T, Matei D, Fielding A, Spencer S, Dougherty B, Orr M, Hodgson D, et al. Olaparib maintenance therapy in patients with platinum-sensitive relapsed serous ovarian cancer: a preplanned retrospective analysis of outcomes by BRCA status in a randomised phase 2 trial. *Lancet Oncol*. 2014; 15:852-861.
19. Bria E, Pilotto S, Amato E, Fassan M, Novello S, Peretti U, Vavala T, Kinspergher S, Righi L, Santo A, Brunelli M, Corbo V, Giglioli E, Sperduti I, Milella M, Chilos M, et al. Molecular heterogeneity assessment by next-generation sequencing and response to gefitinib of EGFR mutant advanced lung adenocarcinoma. *Oncotarget*. 2015; 6:12783-95. doi: 10.18632/oncotarget.3727.
20. Luchini C, Capelli P, Fassan M, Simbolo M, Mafficini A, Pedica F, Ruzzenente A, Guglielmi A, Corbo V and Scarpa A. Next-generation histopathologic diagnosis: a lesson from a hepatic carcinosarcoma. *J Clin Oncol*. 2014; 32:e63-66.

21. Mafficini A, Amato E, Fassan M, Simbolo M, Antonello D, Vicentini C, Scardoni M, Bersani S, Gottardi M, Rusev B, Malpeli G, Corbo V, Barbi S, Sikora KO, Lawlor RT, Tortora G, et al. Reporting Tumor Molecular Heterogeneity in Histopathological Diagnosis. *PLoS One*. 2014; 9:e104979.
22. Scarpa A, Sikora K, Fassan M, Rachiglio AM, Cappellesso R, Antonello D, Amato E, Mafficini A, Lambiase M, Esposito C, Bria E, Simonato F, Scardoni M, Turri G, Chilosi M, Tortora G, et al. Molecular typing of lung adenocarcinoma on cytological samples using a multigene next generation sequencing panel. *PLoS One*. 2013; 8:e80478.
23. Simbolo M, Mafficini A, Agostini M, Pedrazzani C, Bedin C, Urso ED, Nitti D, Turri G, Scardoni M, Fassan M and Scarpa A. Next-generation sequencing for genetic testing of familial colorectal cancer syndromes. *Hered Cancer Clin Pract*. 2015; 13:18.
24. Genomes Project C, Abecasis GR, Auton A, Brooks LD, DePristo MA, Durbin RM, Handsaker RE, Kang HM, Marth GT and McVean GA. An integrated map of genetic variation from 1,092 human genomes. *Nature*. 2012; 491:56-65.
25. Majdak EJ, De Bock GH, Brozek I, Perkowska M, Ochman K, Debniak J, Milczek T, Cornelisse CJ, Jassem J, Emerich J, Limon J and Devilee P. Prevalence and clinical correlations of BRCA1/BRCA2 unclassified variant carriers among unselected primary ovarian cancer cases - preliminary report. *Eur J Cancer*. 2005; 41:143-150.
26. Rafnar T, Benediktsdottir KR, Eldon BJ, Gestsson T, Saemundsson H, Olafsson K, Salvarsdottir A, Steingrimsdottir E and Thorlacius S. BRCA2, but not BRCA1, mutations account for familial ovarian cancer in Iceland: a population-based study. *Eur J Cancer*. 2004; 40:2788-2793.
27. Sarantaus L, Vahteristo P, Bloom E, Tamminen A, Unkila-Kallio L, Butzow R and Nevanlinna H. BRCA1 and BRCA2 mutations among 233 unselected Finnish ovarian carcinoma patients. *Eur J Hum Genet*. 2001; 9:424-430.
28. Stratton JF, Gayther SA, Russell P, Dearden J, Gore M, Blake P, Easton D and Ponder BA. Contribution of BRCA1 mutations to ovarian cancer. *N Engl J Med*. 1997; 336:1125-1130.
29. Yazici H, Glendon G, Yazici H, Burnie SJ, Saip P, Buyru F, Bengisu E, Andrulis IL, Dalay N and Ozcelik H. BRCA1 and BRCA2 mutations in Turkish familial and non-familial ovarian cancer patients: a high incidence of mutations in non-familial cases. *Hum Mutat*. 2002; 20:28-34.
30. Antoniou A, Pharoah PD, Narod S, Risch HA, Eyfjord JE, Hopper JL, Loman N, Olsson H, Johannsson O, Borg A, Pasini B, Radice P, Manoukian S, Eccles DM, Tang N, Olah E, et al. Average risks of breast and ovarian cancer associated with BRCA1 or BRCA2 mutations detected in case Series unselected for family history: a combined analysis of 22 studies. *Am J Hum Genet*. 2003; 72:1117-1130.
31. Schrader KA, Hurlburt J, Kalloger SE, Hansford S, Young S, Huntsman DG, Gilks CB and McAlpine JN. Germline BRCA1 and BRCA2 mutations in ovarian cancer: utility of a histology-based referral strategy. *Obstet Gynecol*. 2012; 120:235-240.
32. Pruthi S, Gostout BS and Lindor NM. Identification and Management of Women With BRCA Mutations or Hereditary Predisposition for Breast and Ovarian Cancer. *Mayo Clin Proc*. 2010; 85:1111-1120.
33. Excellence NfHaC. (2013). NICE guidelines [CG164].
34. Prat J and Oncology FCoG. Staging classification for cancer of the ovary, fallopian tube, and peritoneum. *Int J Gynaecol Obstet*. 2014; 124:1-5.
35. Simbolo M, Gottardi M, Corbo V, Fassan M, Mafficini A, Malpeli G, Lawlor RT and Scarpa A. DNA qualification workflow for next generation sequencing of histopathological samples. *PLoS One*. 2013; 8:e62692.
36. Zamo A, Bertolaso A, van Raaij AW, Mancini F, Scardoni M, Montresor M, Menestrina F, van Krieken JH, Chilosi M, Groenen PJ and Scarpa A. Application of microfluidic technology to the BIOMED-2 protocol for detection of B-cell clonality. *J Mol Diagn*. 2012; 14:30-37.
37. Cingolani P, Patel VM, Coon M, Nguyen T, Land SJ, Ruden DM and Lu X. Using *Drosophila melanogaster* as a Model for Genotoxic Chemical Mutational Studies with a New Program, SnpSift. *Front Genet*. 2012; 3:35.
38. McLaren W, Pritchard B, Rios D, Chen Y, Flicek P and Cunningham F. Deriving the consequences of genomic variants with the Ensembl API and SNP Effect Predictor. *Bioinformatics*. 2010; 26:2069-2070.
39. Robinson JT, Thorvaldsdottir H, Winckler W, Guttman M, Lander ES, Getz G and Mesirov JP. Integrative genomics viewer. *Nat Biotechnol*. 2011; 29:24-26.
